# Supplementary material
Source: publisher figshare collection journal article supplement (https://karger.figshare.com/articles/dataset/_/5127130)

Fig. 1S. Hippocampus

*wt*

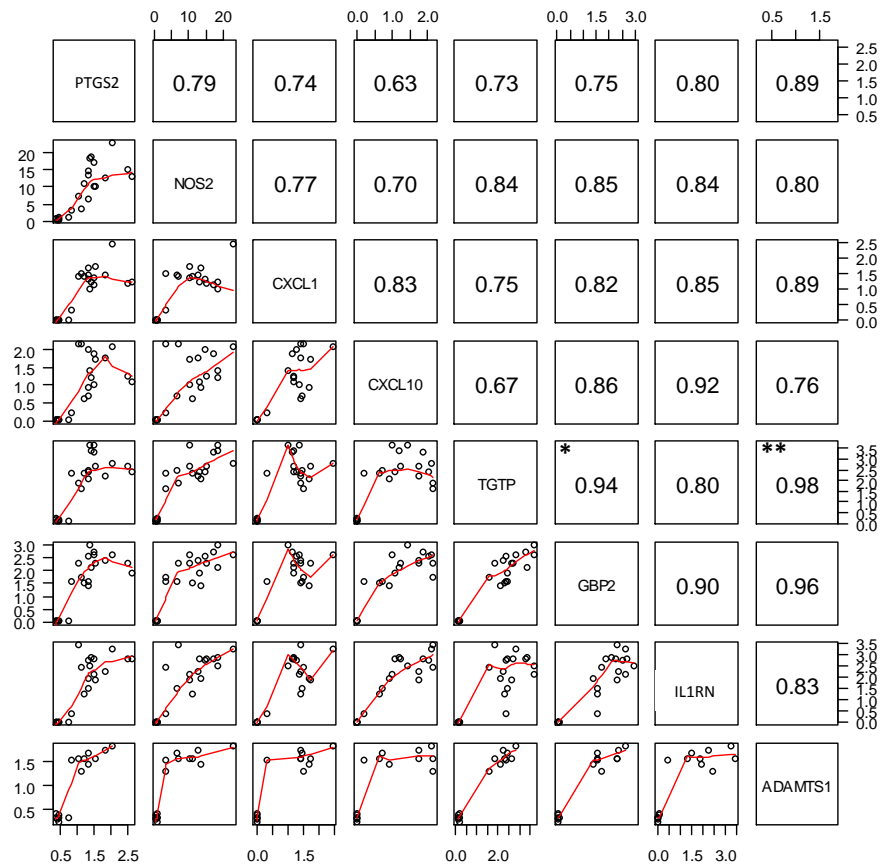

*casp1<sup>-/-</sup>*

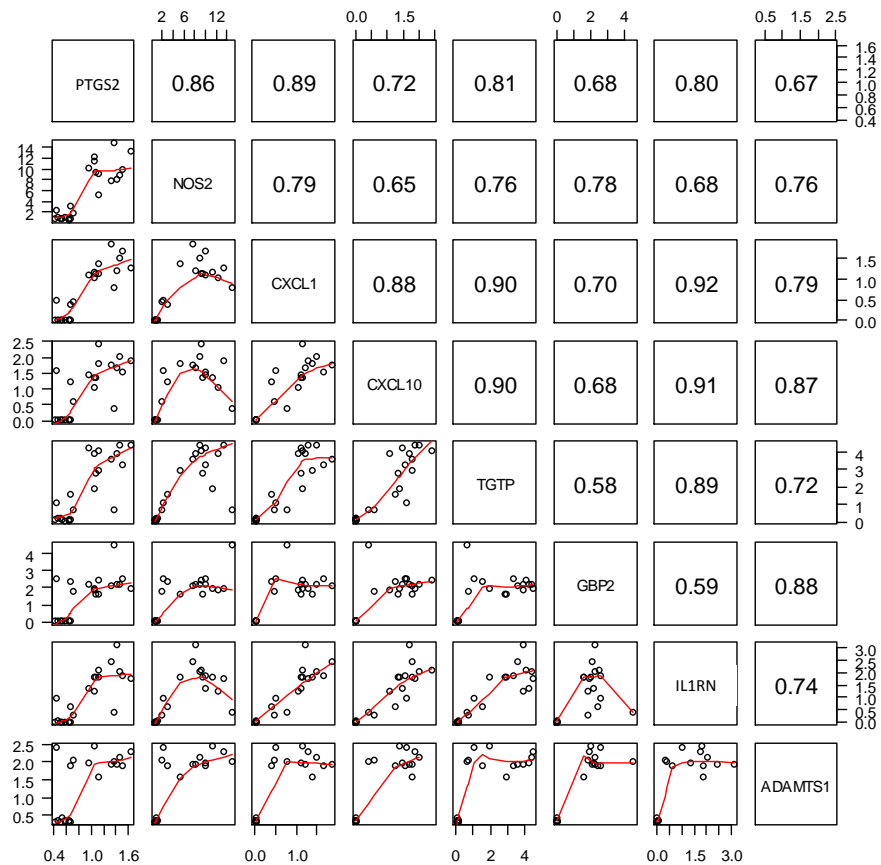

Fig. 2S. Spleen

*wt*

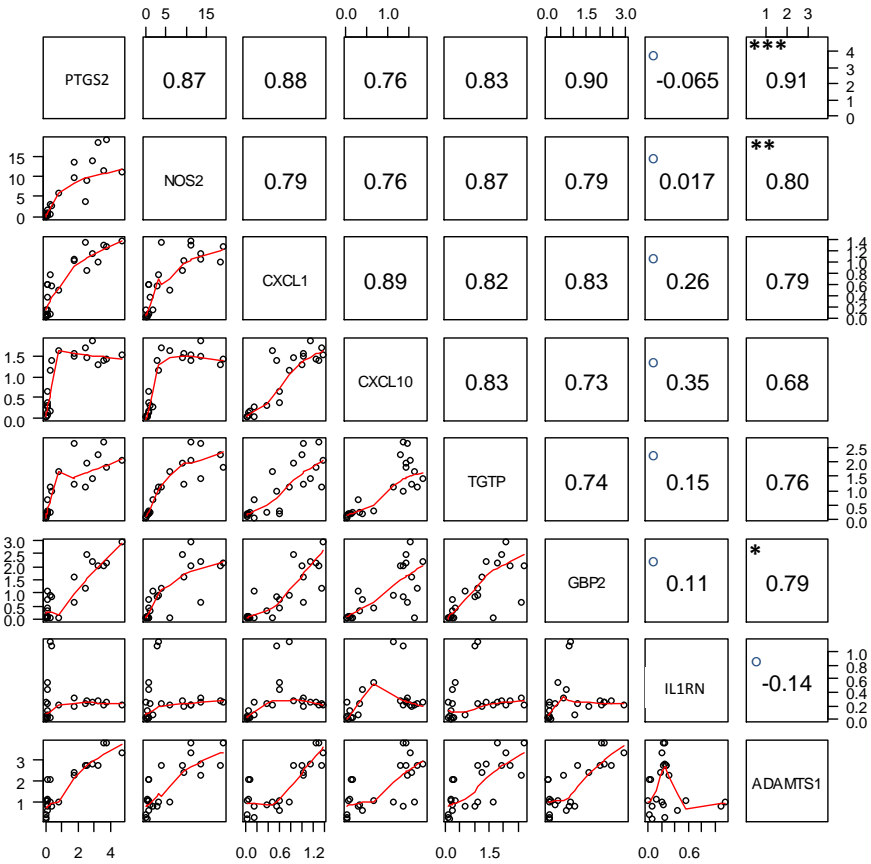

*casp1<sup>-/-</sup>*

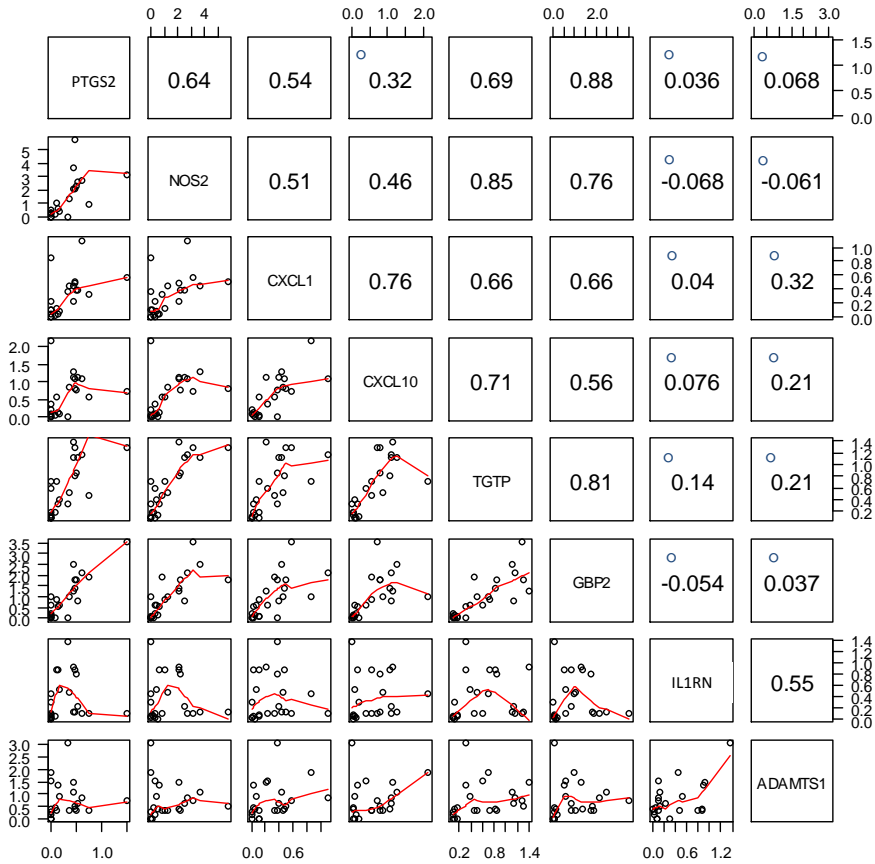

Fig. 3S. Adrenals

*wt*

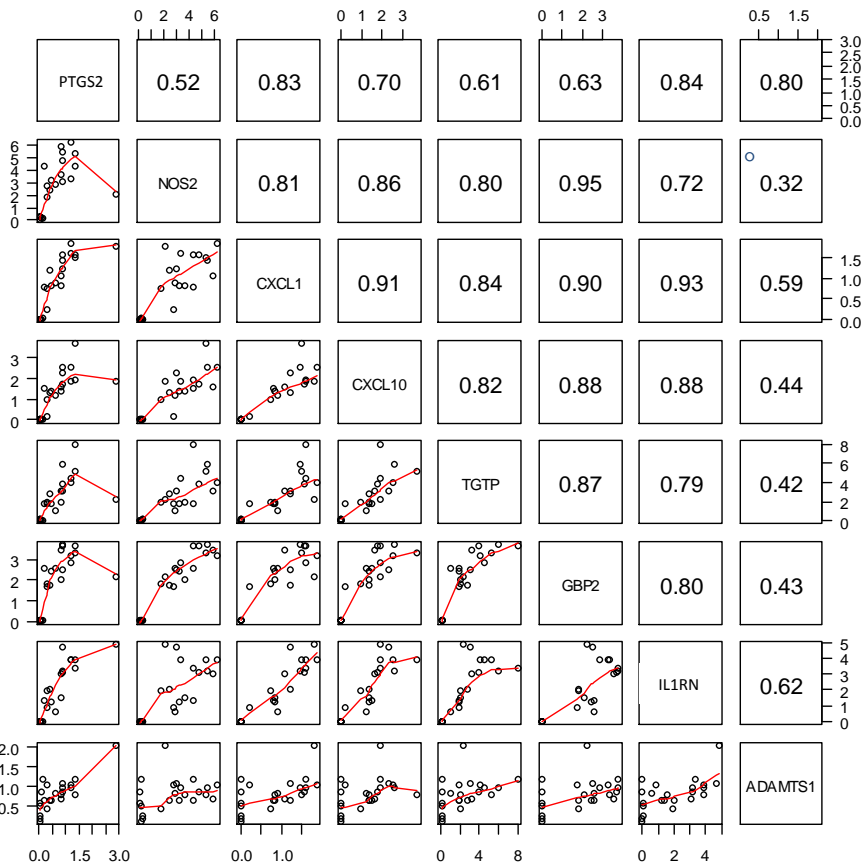

*casp1<sup>-/-</sup>*

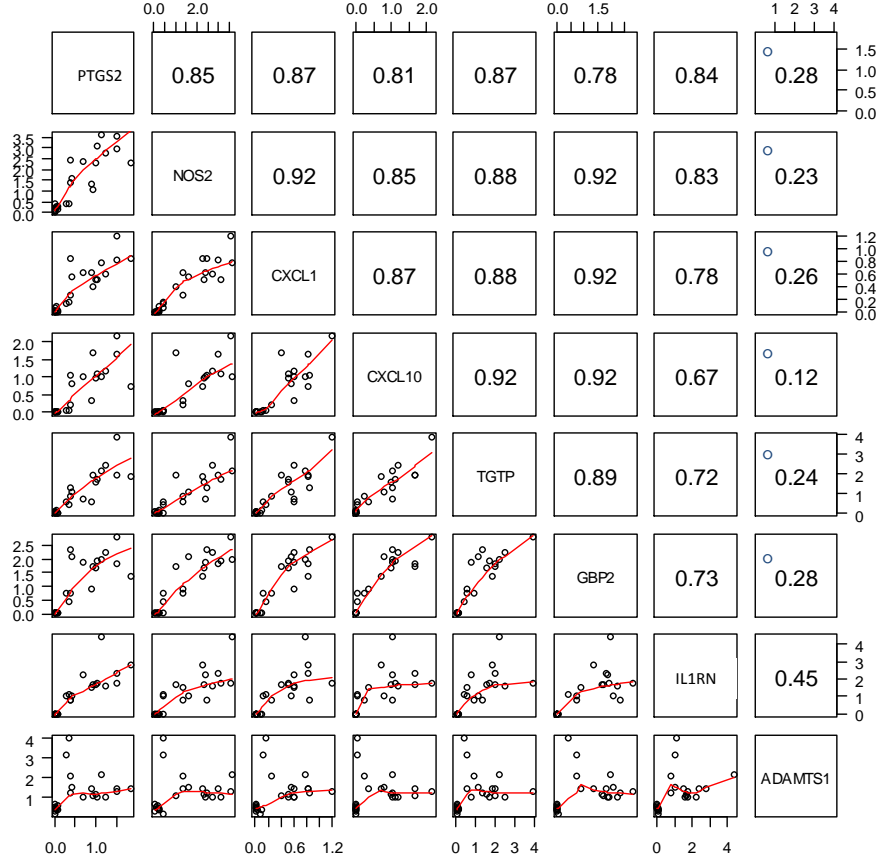

Supplement: Supplementary file 1 [file 1]
